# Supplementary material for: Catalase as a Molecular Target for Male Infertility Diagnosis and Monitoring: An Overview
Source: PubMed Central journal article supplement (PMC7022443; doi:10.3390/antiox9010078), 2020-01-16
Supplement: antioxidants-09-00078-s001.pdf [file antioxidants-09-00078-s001.pdf]

## Catalase as molecular target for male infertility diagnosis and monitoring: an overview.

Nuria Rubio, Natalia Huerta, María José Gómez, Rosa María Martínez-Espinosa

Antioxidants

**Supplementary Table S1.** Articles included in the database after application of the inclusion and exclusion criteria.

| Title Primary                                                                                                                                               | Authors, Primary                                                                                                                                       | Journal                                       | Pub Year | ISSN/ISBN | DOI                              |
|-------------------------------------------------------------------------------------------------------------------------------------------------------------|--------------------------------------------------------------------------------------------------------------------------------------------------------|-----------------------------------------------|----------|-----------|----------------------------------|
| A Randomized Controlled Trial of Lycopene Treatment on Soluble Receptor for Advanced Glycation End Products in Seminal and Blood Plasma of Normospermic Men | Oborna, Ivana; Malickova, Karin; Fingerova, Helena; Brezinova, Jana; Horka, Petra; Novotny, Jiri; Bryndova, Hana; Filipcikova, Radka; Svobodova, Magda | American Journal of Reproductive Immunology   | 2011     | 1046-7408 | 10.1111/j.1600-0897.2011.00984.x |
| A search for molecular mechanisms underlying male idiopathic infertility                                                                                    | Bracke, An; Peeters, Kris; Punjabi, Usha; Hoogewijs, David; Dewilde, Sylvia                                                                            | Reproductive Biomedicine Online               | 2018     | 1472-6483 | 10.1016/j.rbmo.2017.12.005       |
| Alcohol abuse-duration dependent decrease in plasma testosterone and antioxidants in males.                                                                 | Maneesh, M.; Dutta, Sanjiba; Chakrabarti, Amit; Vasudevan, D. M.                                                                                       | Indian journal of physiology and pharmacology | 2006     | 0019-5499 |                                  |
| An updated systematic review on the possible effect of nonylphenol on male fertility                                                                        | Noorimotlagh, Zahra; Haghghi, Neemat Jaafarzadeh; Ahmadimoghadam, Mehdi; Rahim, Fakher                                                                 | Environmental Science and Pollution Research  | 2017     | 0944-1344 | 10.1007/s11356-016-7960-y        |
| Antioxidant strategies in the epididymis                                                                                                                    | Vernet, P.; Aitken, R. J.; Drevet, J. R.                                                                                                               | Molecular and cellular endocrinology          | 2004     | 0303-7207 | 10.1016/j.mce.2003.10.069        |
| Antioxidants and sperm DNA damage: a clinical perspective                                                                                                   | Zini, Armand; Gabriel, Maria San; Baazeem, Abdulaziz                                                                                                   | Journal of assisted reproduction and genetics | 2009     | 1058-0468 | 10.1007/s10815-009-9343-5        |
| Association of state and trait anxiety to semen quality of in vitro fertilization patients: a controlled study                                              | Vellani, Elisa; Colasante, Alessandro; Mamazza, Luciana; Minasi, Maria Giulia; Greco, Ermanno; Bevilacqua, Arturo                                      | Fertility and sterility                       | 2013     | 0015-0282 | 10.1016/j.fertnstert.2013.01.098 |
| Avoiding Toxins Including Spermatotoxic Medications                                                                                                         | Stearns, Gillian; Turek, Paul J.                                                                                                                       | Seminars in reproductive medicine             | 2013     | 1526-8004 | 10.1055/s-0033-1345276           |
| Biomarkers for Male Reproductive health hazards: Are they available?                                                                                        | Ong, C. N.; Shen, H. M.; Chia, S. E.                                                                                                                   | Toxicology letters                            | 2002     | 0378-4274 | 10.1016/S0378-4274(02)00159-5    |
| Cell Phones and Male Infertility: A Review of Recent Innovations in Technology and Consequences                                                             | Agarwal, Ashok; Singh, Aspinder; Hamada, Alaa; Kesari, Kavindra                                                                                        | International Braz J Urol                     | 2011     | 1677-5538 | 10.1590/S1677-55382011000400002  |
| Cell phones: modern man's nemesis?                                                                                                                          | Makker, Kartikeya; Varghese, Alex; Desai, Nisarg R.; Mouradi, Rand; Agarwal, Ashok                                                                     | Reproductive Biomedicine Online               | 2009     | 1472-6483 | 10.1016/S1472-6483(10)60437-3    |
| Chromosomal aberrations, Yq microdeletion, and sperm DNA fragmentation in infertile men opting for assisted reproduction                                    | Shamsi, Monis B.; Kumar, Rajeev; Malhotra, Neena; Singh, Nita; Mittal, Suneeta; Upadhyay, Ashish D.; Dada, Rima                                        | Molecular reproduction and development        | 2012     | 1040-452X | 10.1002/mrd.22072                |
| Combined aerobic and resistance exercise training for improving reproductive function in infertile men: a randomized controlled trial                       | Maleki, Behzad Hajizadeh; Tartibian, Bakhtyar                                                                                                          | Applied Physiology Nutrition and Metabolism   | 2017     | 1715-5312 | 10.1139/apnm-2017-0249           |
| Contemporary evidence on the physiological role of reactive oxygen species in human sperm function                                                          | Du Plessis, Stefan S.; Agarwal, Ashok; Halabi, Jacques; Tvrdá, Eva                                                                                     | Journal of assisted reproduction and genetics | 2015     | 1058-0468 | 10.1007/s10815-014-0425-7        |
| Contribution of sperm molecular features to embryo quality and assisted reproduction success                                                                | Garrido, Nicolas; Remohi, Jose; Antonio Martinez-Conejero, Jose; Garcia-Herrero, Sandra; Pellicer, Antonio; Meseguer, Marcos                           | Reproductive Biomedicine Online               | 2008     | 1472-6483 | 10.1016/S1472-6483(10)60415-4    |

|                                                                                                                                                                                                     |                                                                                                                                                    |                                                                             |      |                                                 |                                   |
|-----------------------------------------------------------------------------------------------------------------------------------------------------------------------------------------------------|----------------------------------------------------------------------------------------------------------------------------------------------------|-----------------------------------------------------------------------------|------|-------------------------------------------------|-----------------------------------|
| Cooperative function of antioxidant and redox systems against oxidative stress in male reproductive tissues                                                                                         | Fujii, J.; Iuchi, Y.; Matsuki, S.; Ishii, T.                                                                                                       | Asian Journal of Andrology                                                  | 2003 | 1008-682X                                       |                                   |
| Cytokines in the male reproductive tract and their role in infertility disorders                                                                                                                    | Fraczek, Monika; Kurpisz, Maciej                                                                                                                   | Journal of reproductive immunology                                          | 2015 | 0165-0378                                       | 10.1016/j.jri.2015.02.001         |
| Detecting and Minimizing Sperm DNA Damage                                                                                                                                                           | Zhang, Yachao; Trussell, J. C.; Chohan, Kazim R.                                                                                                   | Seminars in reproductive medicine                                           | 2013 | 1526-8004                                       | 10.1055/s-0033-1345274            |
| Detection of oxidative DNA damage in human sperm and its association with sperm function and male infertility                                                                                       | Shen, H. M.; Ong, C. N.                                                                                                                            | Free Radical Biology and Medicine                                           | 2000 | 0891-5849                                       | 10.1016/S0891-5849(99)00234-8     |
| Diabetes-induced hyperglycemia impairs male reproductive function: a systematic review                                                                                                              | Maresch, Constanze C.; Stute, Dina C.; Alves, Marco G.; Oliveira, Pedro F.; de Kretser, David M.; Linn, Thomas                                     | Human reproduction update                                                   | 2018 | 1355-4786                                       | 10.1093/humupd/dmx033             |
| Diagnosis and impact of sperm DNA alterations in assisted reproduction                                                                                                                              | Simon, Luke; Emery, Benjamin R.; Carrell, Douglas T.                                                                                               | Best Practice & Research Clinical Obstetrics & Gynaecology                  | 2017 | 1521-6934                                       | 10.1016/j.bpobgyn.2017.07.003     |
| Dietary patterns, foods and nutrients in male fertility parameters and fecundability: a systematic review of observational studies                                                                  | Salas-Huetos, Albert; Bullo, Monica; Salas-Salvado, Jordi                                                                                          | Human reproduction update                                                   | 2017 | 1355-4786                                       | 10.1093/humupd/dmx006             |
| Effect of Coenzyme Q10 supplementation on antioxidant enzymes activity and oxidative stress of seminal plasma: a double-blind randomised clinical trial                                             | Nadjarzadeh, A.; Shidfar, F.; Amirjannati, N.; Vafa, M. R.; Motevalian, S. A.; Gohari, M. R.; Kakhki, S. A. Nazeri; Akhondi, M. M.; Sadeghi, M. R. | Andrologia                                                                  | 2014 | 0303-4569                                       | 10.1111/and.12062                 |
| Effect of pentoxifylline on semen parameters, reproductive hormones, and seminal plasma antioxidant capacity in men with idiopathic infertility: a randomized double-blind placebo-controlled study | Safarinejad, Mohammad Reza                                                                                                                         | International urology and nephrology                                        | 2011 | 0301-1623                                       | 10.1007/s11255-010-9826-4         |
| Effects of N-acetylcysteine on Semen Parameters and Oxidative/Antioxidant Status                                                                                                                    | Ciftci, Halil; Verit, Ayhan; Savas, Murat; Yeni, Ercan; Erel, Ozcan                                                                                | Urology                                                                     | 2009 | 0090-4295                                       | 10.1016/j.urology.2009.02.034     |
| Effects of oral antioxidant treatment upon the dynamics of human sperm DNA fragmentation and subpopulations of sperm with highly degraded DNA                                                       | Abad, C.; Amengual, M. J.; Gosalvez, J.; Coward, K.; Hannaoui, N.; Benet, J.; Garcia-Peiro, A.; Prats, J.                                          | Andrologia                                                                  | 2013 | 0303-4569                                       | 10.1111/and.12003                 |
| Environmental and occupational pesticide exposure and human sperm parameters: A systematic review                                                                                                   | Martenies, Sheena E.; Perry, Melissa J.                                                                                                            | Toxicology                                                                  | 2013 | 0300-483X                                       | 10.1016/j.tox.2013.02.005         |
| Falling sperm counts twenty years on: where are we now?                                                                                                                                             | Aitken, R. John                                                                                                                                    | Asian Journal of Andrology                                                  | 2013 | 1008-682X                                       | 10.1038/aja.2012.167              |
| Fertility and Sperm Quality in the Aging Male                                                                                                                                                       | Almeida, Susana; Rato, Luis; Sousa, Mario; Alves, Marco G.; Oliveira, Pedro F.                                                                     | Current pharmaceutical design                                               | 2017 | 1381-6128                                       | 10.2174/1381612823666170503150313 |
| Fluoride Toxicity in the Male Reproductive System                                                                                                                                                   | Long, Hu; Jin, Ying; Lin, Mu; Sun, Yu; Zhang, Liang; Clinch, Carole                                                                                | Fluoride                                                                    | 2009 | 0015-4725                                       |                                   |
| Free Radical Theory of Aging: Implications in Male Infertility                                                                                                                                      | Desai, Nisarg; Sabanegh, Edmund, Jr.; Kim, Taesoo; Agarwal, Ashok                                                                                  | Urology                                                                     | 2010 | 0090-4295                                       | 10.1016/j.urology.2009.05.025     |
| Genetic and molecular diagnostics of male infertility in the clinical practice                                                                                                                      | Pizzol, Damiano; Ferlin, Alberto; Garolla, Andrea; Lenzi, Andrea; Bertoldo, Alessandro; Foresta, Carlo                                             | Frontiers in Bioscience-Landmark                                            | 2014 | 1093-9946                                       | 10.2741/4208                      |
| Heat Shock Protein A2 (HSPA2): Regulatory Roles in Germ Cell Development and Sperm Function                                                                                                         | Nixon, Brett; Bromfield, Elizabeth G.; Cui, Jinwei; De Iuliis, Geoffrey N.                                                                         | Role of Heat Shock Proteins in Reproductive System Development and Function | 2017 | 0301-5556; 978-3-319-51409-3; 978-3-319-51408-6 | 10.1007/978-3-319-51409-3_4       |
| High-energy diets: a threat for male fertility?                                                                                                                                                     | Rato, L.; Alves, M. G.; Cavaco, J. E.; Oliveira, P. F.                                                                                             | Obesity Reviews                                                             | 2014 | 1467-7881                                       | 10.1111/obr.12226                 |

|                                                                                                                                                                                                                               |                                                                                                                                                                            |                                                                     |      |           |                                   |
|-------------------------------------------------------------------------------------------------------------------------------------------------------------------------------------------------------------------------------|----------------------------------------------------------------------------------------------------------------------------------------------------------------------------|---------------------------------------------------------------------|------|-----------|-----------------------------------|
| How to overcome male infertility after 40: Influence of paternal age on fertility                                                                                                                                             | Belloc, Stephanie; Hazout, Andre; Zini, Armand; Merviel, Philippe; Cabry, Rosalie; Chahine, Hikmat; Copin, Henri; Benkhalifa, Moncef                                       | Maturitas                                                           | 2014 | 0378-5122 | 10.1016/j.maturitas.2014.02.011   |
| Impact of Fungicides on Male Reproductive Health: A Review                                                                                                                                                                    | Sharma, Aksha; Sharma, Preeti; Sharma, Priyanka; Jasuja, Nakuleshwar D.; Joshi, Suresh C.                                                                                  | Research Journal of Pharmaceutical Biological and Chemical Sciences | 2015 | 0975-8585 |                                   |
| Impact of Oxidative Stress on Male Fertility - a Review                                                                                                                                                                       | Tvrda, Eva; Knazicka, Zuzana; Bardos, Laszlo; Massanyi, Peter; Lukac, Norbert                                                                                              | Acta Veterinaria Hungarica                                          | 2011 | 0236-6290 | 10.1556/AVet.2011.034             |
| Increased oxidative stress and oxidative damage associated with chronic bacterial prostatitis                                                                                                                                 | Zhou, J. F.; Xiao, W. Q.; Zheng, Y. C.; Dong, J.; Zhang, S. M.                                                                                                             | Asian Journal of Andrology                                          | 2006 | 1008-682X | 10.1111/j.1745-7262.2006.00144.x  |
| Influence of reactive oxygen species on human sperm functions and fertilizing capacity including therapeutical approaches                                                                                                     | Chen, Shu-jian; Allam, Jean-Pierre; Duan, Yong-gang; Haidl, Gerhard                                                                                                        | Archives of Gynecology and Obstetrics                               | 2013 | 0932-0067 | 10.1007/s00404-013-2801-4         |
| Insight into oxidative stress in varicocele-associated male infertility: part 1                                                                                                                                               | Agarwal, Ashok; Hamada, Alaa; Esteves, Sandro C.                                                                                                                           | Nature Reviews Urology                                              | 2012 | 1759-4812 | 10.1038/nrurol.2012.197           |
| Iron and copper in male reproduction: a double-edged sword                                                                                                                                                                    | Tvrda, Eva; Peer, Rohan; Sikka, Suresh C.; Agarwal, Ashok                                                                                                                  | Journal of assisted reproduction and genetics                       | 2015 | 1058-0468 | 10.1007/s10815-014-0344-7         |
| Leukocytes and oxidative stress: dilemma for sperm function and male fertility                                                                                                                                                | Henkel, Ralf R.                                                                                                                                                            | Asian Journal of Andrology                                          | 2011 | 1008-682X | 10.1038/aja.2010.76               |
| Lifestyle and fertility: the influence of stress and quality of life on male fertility                                                                                                                                        | Ilacqua, Alessandro; Izzo, Giulia; Emerenziani, Gian Pietro; Baldari, Carlo; Aversa, Antonio                                                                               | Reproductive Biology and Endocrinology                              | 2018 | 1477-7827 | 10.1186/s12958-018-0436-9         |
| Loss of livestock breeding efficiency due to uncompensable sperm nuclear defects                                                                                                                                              | Evenson, D. P.                                                                                                                                                             | Reproduction Fertility and Development                              | 1999 | 1031-3613 | 10.1071/RD98023                   |
| Low-dose radiation-induced risk in spermatogenesis                                                                                                                                                                            | Fukunaga, Hisanori; Butterworth, Karl T.; Yokoya, Akinari; Ogawa, Takehiko; Prise, Kevin M.                                                                                | International journal of radiation biology                          | 2017 | 0955-3002 | 10.1080/09553002.2017.1355579     |
| May antioxidant therapy improve sperm parameters of men with persistent oligospermia after retrograde embolization for varicocele?                                                                                            | Galatioto, Giuseppe Paradiso; Gravina, Giovanni Luca; Angelozzi, Giovanni; Sacchetti, Antonia; Innominato, Pier Ferdinando; Pace, Gianna; Ranieri, Guido; Vicentini, Carlo | World journal of urology                                            | 2008 | 0724-4983 | 10.1007/s00345-007-0218-z         |
| Mechanism, measurement, and prevention of oxidative stress in male reproductive physiology                                                                                                                                    | Agarwal, Ashok; Prabakaran, Sushil A.                                                                                                                                      | Indian journal of experimental biology                              | 2005 | 0019-5189 |                                   |
| Mechanisms of male infertility: Role of antioxidants                                                                                                                                                                          | Sheweita, S. A.; Tilmisany, A. M.; Al-Sawaf, H.                                                                                                                            | Current Drug Metabolism                                             | 2005 | 1389-2002 | 10.2174/138920005774330594        |
| Mechanisms of the harmful effects of bacterial semen infection on ejaculated human spermatozoa: potential inflammatory markers in semen                                                                                       | Fraczek, Monika; Kurpisz, Maciej                                                                                                                                           | Folia Histochemica Et Cytobiologica                                 | 2015 | 0239-8508 | 10.5603/FHC.a2015.0019            |
| Melatonin and Male Reproductive Health: Relevance of Darkness and Antioxidant Properties                                                                                                                                      | Rocha, C. S.; Rato, L.; Martins, A. D.; Alves, M. G.; Oliveira, P. F.                                                                                                      | Current Molecular Medicine                                          | 2015 | 1566-5240 | 10.2174/1566524015666150505155530 |
| Melatonin, Advanced Oxidation Protein Products and Total Antioxidant Capacity as Seminal Parameters of Prooxidant-Antioxidant Balance and their Connection with Expression of Metalloproteinases in Context of Male Fertility | Kratz, E. M.; Piwowar, A.                                                                                                                                                  | Journal of Physiology and Pharmacology                              | 2017 | 0867-5910 |                                   |
| Microbiological investigation in male infertility: a practical overview                                                                                                                                                       | La Vignera, Sandro; Condorelli, Rosita A.; Vicari, Enzo; Salmeri, Mario; Morgia, Giuseppe; Favilla, Vincenzo; Cimino, Sebastiano; Calogero, Aldo E.                        | Journal of medical microbiology                                     | 2014 | 0022-2615 | 10.1099/jmm.0.062968-0            |

|                                                                                                                                                                                                                             |                                                                                                                              |                                                          |      |           |                                  |
|-----------------------------------------------------------------------------------------------------------------------------------------------------------------------------------------------------------------------------|------------------------------------------------------------------------------------------------------------------------------|----------------------------------------------------------|------|-----------|----------------------------------|
| Mitochondria functionality and sperm quality                                                                                                                                                                                | Amaral, Alexandra; Lourenco, Barbara; Marques, Monica; Ramalho-Santos, Joao                                                  | Reproduction                                             | 2013 | 1470-1626 | 10.1530/REP-13-0178              |
| Molecular mechanisms beyond glucose transport in diabetes-related male infertility                                                                                                                                          | Alves, M. G.; Martins, A. D.; Rato, L.; Moreira, P. I.; Socorro, S.; Oliveira, P. F.                                         | Biochimica Et Biophysica Acta-Molecular Basis of Disease | 2013 | 0925-4439 | 10.1016/j.bbadis.2013.01.011     |
| Mucuna pruriens improves male fertility by its action on the hypothalamus-pituitary-gonadal axis                                                                                                                            | Shukla, Kamla Kant; Mahdi, Abbas Ali; Ahmad, Mohammad Kaleem; Shankhwar, Satya Narain; Rajender, Singh; Jaiswar, Shyam Pyari | Fertility and sterility                                  | 2009 | 0015-0282 | 10.1016/j.fertnstert.2008.09.045 |
| Novel Concepts in Male Infertility                                                                                                                                                                                          | Esteves, Sandro C.; Agarwal, Ashok                                                                                           | International Braz J Urol                                | 2011 | 1677-5538 | 10.1590/S1677-55382011000700002  |
| Nutrient Supplementation: Improving Male Fertility Fourfold                                                                                                                                                                 | Mora-Esteves, Cesar; Shin, David                                                                                             | Seminars in reproductive medicine                        | 2013 | 1526-8004 | 10.1055/s-0033-1345277           |
| Obesity and Male Infertility: Role of Fatty Acids in the Modulation of Sperm Energetic Metabolism                                                                                                                           | Ferramosca, Alessandra; Di Giacomo, Mariangela; Moscatelli, Natalina; Zara, Vincenzo                                         | European Journal of Lipid Science and Technology         | 2018 | 1438-7697 | 10.1002/ejlt.201700451           |
| Obesity, a serious etiologic factor for male subfertility in modern society                                                                                                                                                 | Liu, Yue; Ding, Zhide                                                                                                        | Reproduction                                             | 2017 | 1470-1626 | 10.1530/REP-17-0161              |
| Paternal obesity negatively affects male fertility and assisted reproduction outcomes: a systematic review and meta-analysis                                                                                                | Campbell, Jared M.; Lane, Michelle; Owens, Julie A.; Bakos, Hassan W.                                                        | Reproductive Biomedicine Online                          | 2015 | 1472-6483 | 10.1016/j.rbmo.2015.07.012       |
| Physiological Intra-Cytoplasmic Sperm Injection (PICS) outcomes after oral pretreatment and semen incubation with myo-inositol in oligoasthenoteratozoospermic men: results from a prospective, randomized controlled trial | Korosi, T.; Barta, C.; Rokob, K.; Torok, T.                                                                                  | European review for medical and pharmacological sciences | 2017 | 1128-3602 |                                  |
| Potential biological role of poly (ADP-ribose) polymerase (PARP) in male gametes                                                                                                                                            | Agarwal, Ashok; Mahfouz, Reda Z.; Sharma, Rakesh K.; Sarkar, Oli; Mangrola, Devna; Mathur, Premendu P.                       | Reproductive Biology and Endocrinology                   | 2009 | 1477-7827 | 10.1186/1477-7827-7-143          |
| Pro-oxidative and anti-oxidative imbalance in human semen and its relation with male fertility                                                                                                                              | Garrido, N.; Meseguer, M.; Simon, C.; Pellicer, A.; Remohi, J.                                                               | Asian Journal of Andrology                               | 2004 | 1008-682X |                                  |
| Radiations and male fertility                                                                                                                                                                                               | Kesari, Kavindra Kumar; Agarwal, Ashok; Henkel, Ralf                                                                         | Reproductive Biology and Endocrinology                   | 2018 | 1477-7827 | 10.1186/s12958-018-0431-1        |
| Reactive oxygen species and their influence on stallion semen fertility - a review                                                                                                                                          | Pagl, R.; Aurich, J.; Aurich, C.                                                                                             | Pferdeheilkunde                                          | 2006 | 0177-7726 | 10.21836/PEM20060217             |
| Reactive oxygen species in human sperm suspensions: production by leukocytes and the generation of NADPH to protect sperm against their effects                                                                             | Ford, W. C. L.; Whittington, K.; Williams, A. C.                                                                             | International journal of andrology                       | 1997 | 0105-6263 |                                  |
| Recent scenario of obesity and male fertility                                                                                                                                                                               | Shukla, K. K.; Chambial, S.; Dwivedi, S.; Misra, S.; Sharma, P.                                                              | Andrology                                                | 2014 | 2047-2919 | 10.1111/andr.270                 |
| Redox regulation of fertilisation and the spermatogenic process                                                                                                                                                             | Fujii, Junichi; Tsunoda, Satoshi                                                                                             | Asian Journal of Andrology                               | 2011 | 1008-682X | 10.1038/aja.2011.10              |
| Reduction of the incidence of sperm DNA fragmentation by oral antioxidant treatment                                                                                                                                         | Greco, E.; Iacobelli, M.; Rienzi, L.; Ubaldi, F.; Ferrero, S.; Tesarik, J.                                                   | Journal of andrology                                     | 2005 | 0196-3635 | 10.2164/jandrol.04146            |
| Resistance exercise modulates male factor infertility through anti-inflammatory and antioxidative mechanisms in infertile men: A RCT                                                                                        | Maleki, Behzad Hajizadeh; Tartibian, Bakhtyar                                                                                | Life Sciences                                            | 2018 | 0024-3205 | 10.1016/j.lfs.2018.04.039        |
| Review of local herbal compounds found in the Iranian traditional medicine known to optimise male fertility                                                                                                                 | Nejatbakhsh, F.; Shirbeigi, L.; Rahimi, R.; Abolhassani, H.                                                                  | Andrologia                                               | 2016 | 0303-4569 | 10.1111/and.12675                |
| Role of oxidants in male infertility: rationale, significance, and treatment                                                                                                                                                | Agarwal, A.; Saleh, R. A.                                                                                                    | Urologic Clinics of North America                        | 2002 | 0094-0143 | 10.1016/S0094-0143(02)00081-2    |

|                                                                                                                                                              |                                                                                                                                                                                    |                                                                |      |                                                 |                                   |
|--------------------------------------------------------------------------------------------------------------------------------------------------------------|------------------------------------------------------------------------------------------------------------------------------------------------------------------------------------|----------------------------------------------------------------|------|-------------------------------------------------|-----------------------------------|
| Role of oxidative stress and antioxidants in male infertility                                                                                                | Sikka, S. C.; Rajasekaran, M.; Hellstrom, W. J. G.                                                                                                                                 | Journal of andrology                                           | 1995 | 0196-3635                                       |                                   |
| Role of reactive oxygen species in male infertility                                                                                                          | Sharma, R. K.; Agarwal, A.                                                                                                                                                         | Urology                                                        | 1996 | 0090-4295                                       | 10.1016/S0090-4295(96)00313-5     |
| Role of Withania somnifera (Ashwagandha) in the management of male infertility                                                                               | Sengupta, Pallav; Agarwal, Ashok; Pogrebetskaya, Maria; Roychoudhury, Shubhadeep; Durairajanayagam, Damayanthi; Henkel, Ralf                                                       | Reproductive Biomedicine Online                                | 2018 | 1472-6483                                       | 10.1016/j.rbmo.2017.11.007        |
| Seminal suPAR Levels as Marker of Abacterial Male Accessory Gland Inflammation in Hypogonadism                                                               | Milardi, Domenico; Grande, Giuseppe; Autilio, Chiara; Mancini, Francesca; De Marinis, Laura; Marana, Riccardo; Zuppi, Cecilia; Urbani, Andrea; Pontecorvi, Alfredo; Baroni, Silvia | Protein and Peptide Letters                                    | 2018 | 0929-8665                                       | 10.2174/0929866525666180418121421 |
| Sperm chromatin structure and male fertility: biological and clinical aspects                                                                                | Erenpreiss, J.; Spano, M.; Erenpreisa, J.; Bungum, M.; Giwercman, A.                                                                                                               | Asian Journal of Andrology                                     | 2006 | 1008-682X                                       | 10.1111/j.1745-7262.2006.00112.x  |
| Sperm Cryopreservation: Effects on Chromatin Structure                                                                                                       | Paoli, Donatella; Lombardo, Francesco; Lenzi, Andrea; Gandini, Loredana                                                                                                            | Genetic Damage in Human Spermatozoa                            | 2014 | 0065-2598; 978-1-4614-7783-9; 978-1-4614-7782-2 | 10.1007/978-1-4614-7783-9_9       |
| Sperm DNA integrity assays: diagnostic and prognostic challenges and implications in management of infertility                                               | Shamsi, Monis Bilal; Imam, Syed Nazar; Dada, Rima                                                                                                                                  | Journal of assisted reproduction and genetics                  | 2011 | 1058-0468                                       | 10.1007/s10815-011-9631-8         |
| Sperm function tests and fertility                                                                                                                           | Aitken, R. J.                                                                                                                                                                      | International journal of andrology                             | 2006 | 0105-6263                                       | 10.1111/j.1365-2605.2005.00630.x  |
| Sperm glucose transport and metabolism in diabetic individuals                                                                                               | Dias, Tania R.; Alves, Marco G.; Silva, Branca M.; Oliveira, Pedro F.                                                                                                              | Molecular and cellular endocrinology                           | 2014 | 0303-7207                                       | 10.1016/j.mce.2014.08.005         |
| Sperm Proteome: What Is on the Horizon?                                                                                                                      | Mohanty, Gayatri; Swain, Nirlipta; Samanta, Luna                                                                                                                                   | Reproductive Sciences                                          | 2015 | 1933-7191                                       | 10.1177/1933719114558918          |
| Spermatozoal sensitive biomarkers to defective protaminosis and fragmented DNA                                                                               | Angelopoulou, Roxani; Plastira, Konstantina; Msaouel, Pavlos                                                                                                                       | Reproductive Biology and Endocrinology                         | 2007 | 1477-7827                                       | 10.1186/1477-7827-5-36            |
| The controversial efficacy of vitamin E for human male infertility                                                                                           | Bolle, P.; Evandri, M. G.; Saso, L.                                                                                                                                                | Contraception                                                  | 2002 | 0010-7824                                       | 10.1016/S0010-7824(02)00277-9     |
| The Effect of Chronic Prostatitis/Chronic Pelvic Pain Syndrome (CP/CPPS) on Semen Parameters in Human Males: A Systematic Review and Meta-Analysis           | Fu, Weihua; Zhou, Zhansong; Liu, Shijian; Li, Qianwei; Yao, Jiwei; Li, Weibing; Yan, Junan                                                                                         | Plos One                                                       | 2014 | 1932-6203                                       | 10.1371/journal.pone.0094991      |
| The effect of cigarette smoking, alcohol consumption and fruit and vegetable consumption on IVF outcomes: a review and presentation of original data         | Firns, Sarah; Cruzat, Vinicius Fernandes; Keane, Kevin Noel; Joesbury, Karen A.; Lee, Andy H.; Newsholme, Philip; Yovich, John L.                                                  | Reproductive Biology and Endocrinology                         | 2015 | 1477-7827                                       | 10.1186/s12958-015-0133-x         |
| The Effects of Honey Supplementation on Seminal Plasma Cytokines, Oxidative Stress Biomarkers, and Antioxidants During 8 Weeks of Intensive Cycling Training | Tartibian, Bakhtyar; Maleki, Behzad Hajizadeh                                                                                                                                      | Journal of andrology                                           | 2012 | 0196-3635                                       | 10.2164/jandrol.110.012815        |
| The effects of three different exercise modalities on markers of male reproduction in healthy subjects: a randomized controlled trial                        | Maleki, Behzad Hajizadeh; Tartibian, Bakhtyar; Chehrizi, Mohammad                                                                                                                  | Reproduction                                                   | 2017 | 1470-1626                                       | 10.1530/REP-16-0318               |
| The hazardous effects of tobacco smoking on male fertility                                                                                                   | Dai, Jing-Bo; Wang, Zhao-Xia; Qiao, Zhong-Dong                                                                                                                                     | Asian Journal of Andrology                                     | 2015 | 1008-682X                                       | 10.4103/1008-682X.150847          |
| The impact of obesity on male fertility                                                                                                                      | Chambers, Thomas J. G.; Anderson, Richard A.                                                                                                                                       | Hormones-International Journal of Endocrinology and Metabolism | 2015 | 1109-3099                                       |                                   |

|                                                                                                                                                               |                                                                                                                          |                                              |      |           |                                   |
|---------------------------------------------------------------------------------------------------------------------------------------------------------------|--------------------------------------------------------------------------------------------------------------------------|----------------------------------------------|------|-----------|-----------------------------------|
| The Impact of Shock Wave Lithotripsy on Male Fertility: A Critical Analysis of Existing Evidence                                                              | Philippou, Prodromos; Ralph, David J.; Timoney, Anthony G.                                                               | Urology                                      | 2012 | 0090-4295 | 10.1016/j.urology.2011.12.003     |
| The impact of sperm protamine deficiency and sperm DNA damage on human male fertility: a systematic review and meta-analysis                                  | Ni, K.; Spiess, A. -N; Schuppe, H. -C; Steger, K.                                                                        | Andrology                                    | 2016 | 2047-2919 | 10.1111/andr.12216                |
| The non-genomic effects of endocrine-disrupting chemicals on mammalian sperm                                                                                  | Tavares, R. S.; Escada-Rebello, S.; Correia, M.; Mota, P. C.; Ramalho-Santos, J.                                         | Reproduction                                 | 2016 | 1470-1626 | 10.1530/REP-15-0355               |
| The role of antioxidant therapy in the treatment of male infertility: an overview                                                                             | Lombardo, Francesco; Sansone, Andrea; Romanelli, Francesco; Paoli, Donatella; Gandini, Loredana; Lenzi, Andrea           | Asian Journal of Andrology                   | 2011 | 1008-682X | 10.1038/aja.2010.183              |
| The Role of Nutraceuticals in Male Fertility                                                                                                                  | Ko, Edmund Y.; Sabanegh, Edmund S.                                                                                       | Urologic Clinics of North America            | 2014 | 0094-0143 | 10.1016/j.ucl.2013.08.003         |
| The Role of Over-the-Counter Supplements for the Treatment of Male Infertility-Fact or Fiction?                                                               | Ko, Edmund Y.; Sabanegh, Edmund S., Jr.                                                                                  | Journal of andrology                         | 2012 | 0196-3635 | 10.2164/jandrol.111.013730        |
| The role of oxidative stress and antioxidants in male fertility.                                                                                              | Walczak-Jedrzejowska, Renata; Wolski, Jan Karol; Slowikowska-Hilczer, Jolanta                                            | Central European journal of urology          | 2013 | 2080-4806 | 10.5173/ceju.2013.01.art19        |
| The role of sperm oxidative stress in male infertility and the significance of oral antioxidant therapy                                                       | Gharagozloo, Parviz; Aitken, R. John                                                                                     | Human Reproduction                           | 2011 | 0268-1161 | 10.1093/humrep/der132             |
| The sperm mitochondrion: Organelle of many functions                                                                                                          | Moraes, Christa R.; Meyers, Stuart                                                                                       | Animal Reproduction Science                  | 2018 | 0378-4320 | 10.1016/j.anireprosci.2018.03.024 |
| The toxicology of indium tin oxide                                                                                                                            | Bomhard, Ernst M.                                                                                                        | Environmental toxicology and pharmacology    | 2016 | 1382-6689 | 10.1016/j.etap.2016.06.011        |
| TNF-alpha -308 polymorphisms and male infertility risk: A meta-analysis and systematic                                                                        | Mostafa, Taymour; Taymour, Mai                                                                                           | Journal of Advanced Research                 | 2016 | 2090-1232 | 10.1016/j.jare.2015.07.001        |
| Toxicants and human sperm chromatin integrity                                                                                                                 | Delbes, Geraldine; Hales, Barbara F.; Robaire, Bernard                                                                   | Molecular human reproduction                 | 2010 | 1360-9947 | 10.1093/molehr/gap087             |
| Unravelling the Power of Omics for the Infertile Aging Male                                                                                                   | Bastos, Paulo; Freitas, Maria Joao; Gomes, Andre; Vitorino, Rui; Fardilha, Margarida                                     | Current pharmaceutical design                | 2017 | 1381-6128 | 10.2174/1381612822666161018155247 |
| Using the alkaline comet assay in prognostic tests for male infertility and assisted reproductive technology outcomes                                         | Lewis, Sheena E. M.; Agbaje, Ishola M.                                                                                   | Mutagenesis                                  | 2008 | 0267-8357 | 10.1093/mutage/gem052             |
| Variations in Antioxidant Genes and Male Infertility.                                                                                                         | Yu, Bolan; Huang, Zhaofeng                                                                                               | BioMed research international                | 2015 |           | 10.1155/2015/513196               |
| Varicocele and testicular function                                                                                                                            | Pastuszak, Alexander W.; Wang, Run                                                                                       | Asian Journal of Andrology                   | 2015 | 1008-682X | 10.4103/1008-682X.153539          |
| Varicocele management in the era of in vitro fertilization/intracytoplasmic sperm injection                                                                   | Pathak, Piyush; Chandrashekar, Aravind; Hakky, Tariq S.; Pastuszak, Alexander W.                                         | Asian Journal of Andrology                   | 2016 | 1008-682X | 10.4103/1008-682X.178482          |
| Varicocele repair: does it still have a role in infertility treatment?                                                                                        | French, Dan B.; Desai, Nisarg R.; Agarwal, Ashok                                                                         | Current opinion in obstetrics & gynecology   | 2008 | 1040-872X | 10.1097/GCO.0b013e3282fccc00c     |
| What every gynecologist should know about male infertility: an update                                                                                         | Esteves, Sandro C.; Hamada, Alaa; Kondray, Victor; Pitchika, Aruna; Agarwal, Ashok                                       | Archives of Gynecology and Obstetrics        | 2012 | 0932-0067 | 10.1007/s00404-012-2274-x         |
| Nitric Oxide and Reactive Oxygen Species in the Pathogenesis of Preeclampsia                                                                                  | Matsubara, Keiichi; Higaki, Takashi; Matsubara, Yuko; Nawa, Akihiro                                                      | International Journal of Molecular Sciences  | 2015 | 1422-0067 | 10.3390/ijms16034600              |
| Novel Concepts in Male Infertility                                                                                                                            | Esteves, Sandro C.; Agarwal, Ashok                                                                                       | International Braz J Urol                    | 2011 | 1677-5538 | 10.1590/S1677-55382011000700002   |
| Nrf2/ARE regulated antioxidant gene expression in endothelial and smooth muscle cells in oxidative stress: implications for atherosclerosis and preeclampsia. | Mann, Giovanni E.; Niehueser-Saran, Jorg; Watson, Alan; Gao, Ling; Ishii, Tetsuro; de Winter, Patricia; Siow, Richard C. | Sheng li xue bao: [Acta physiologica Sinica] | 2007 | 0371-0874 |                                   |

|                                                                                                                              |                                                                                                                                                                                                                                                       |                                                                                                                                                                                                                                         |      |           |                                   |
|------------------------------------------------------------------------------------------------------------------------------|-------------------------------------------------------------------------------------------------------------------------------------------------------------------------------------------------------------------------------------------------------|-----------------------------------------------------------------------------------------------------------------------------------------------------------------------------------------------------------------------------------------|------|-----------|-----------------------------------|
| Nutrient Supplementation: Improving Male Fertility Fourfold                                                                  | Mora-Esteves, Cesar; Shin, David                                                                                                                                                                                                                      | Seminars in reproductive medicine                                                                                                                                                                                                       | 2013 | 1526-8004 | 10.1055/s-0033-1345277            |
| Nutrigenetics and Modulation of Oxidative Stress                                                                             | Da Costa, Laura A.; Badawi, Alaa; El-Soheemy, Ahmed                                                                                                                                                                                                   | Annals of Nutrition and Metabolism                                                                                                                                                                                                      | 2012 | 0250-6807 | 10.1159/000337311                 |
| Nutritional and exercise-based interventions in the treatment of amyotrophic lateral sclerosis                               | Patel, Barkha P.; Hamadeh, Mazen J.                                                                                                                                                                                                                   | Clinical Nutrition                                                                                                                                                                                                                      | 2009 | 0261-5614 | 10.1016/j.clnu.2009.06.002        |
| Obesity and Male Infertility: Role of Fatty Acids in the Modulation of Sperm Energetic Metabolism                            | Ferramosca, Alessandra; Di Giacomo, Mariangela; Moscatelli, Natalina; Zara, Vincenzo                                                                                                                                                                  | European Journal of Lipid Science and Technology                                                                                                                                                                                        | 2018 | 1438-7697 | 10.1002/ejlt.201700451            |
| Obesity, a serious etiologic factor for male subfertility in modern society                                                  | Liu, Yue; Ding, Zhide                                                                                                                                                                                                                                 | Reproduction                                                                                                                                                                                                                            | 2017 | 1470-1626 | 10.1530/REP-17-0161               |
| Omega-3 LCPUFA supplement: a nutritional strategy to prevent maternal and neonatal oxidative stress                          | Kajarabille, Naroa; Hurtado, Jose A.; Pena-Quintana, Luis; Pena, Manuela; Ruiz, Josefa; Diaz-Castro, Javier; Rodriguez-Santana, Yessica; Martin-Alvarez, Estefania; Lopez-Frias, Magdalena; Soldado, Olga; Lara-Villoslada, Federico; Ochoa, Julio J. | Maternal and Child Nutrition                                                                                                                                                                                                            | 2017 | 1740-8695 | 10.1111/mcn.12300                 |
| Oxidant stress in pre-eclampsia and essential hypertension.                                                                  | Kumar, C. A.; Das, U. N.                                                                                                                                                                                                                              | The Journal of the Association of Physicians of India                                                                                                                                                                                   | 2002 | 0004-5772 |                                   |
| Oxidative damage in chemical teratogenesis                                                                                   | Wells, P. G.; Kim, P. M.; Laposa, R. R.; Nicol, C. J.; Parman, T.; Winn, L. M.                                                                                                                                                                        | Mutation Research-Fundamental and Molecular Mechanisms of Mutagenesis                                                                                                                                                                   | 1997 | 0027-5107 | 10.1016/S0027-5107(97)00175-9     |
| Oxidative Stress and Redox Regulation on In Vitro Development of Mammalian Embryos                                           | Takahashi, Masashi                                                                                                                                                                                                                                    | Journal of Reproduction and Development                                                                                                                                                                                                 | 2012 | 0916-8818 | 10.1262/jrd.11-138N               |
| Oxidative Stress and Role of Natural Plant Derived Antioxidants in Animal Reproduction                                       | Zhong Rong-zhen; Zhou Dao-wei                                                                                                                                                                                                                         | Journal of Integrative Agriculture                                                                                                                                                                                                      | 2013 | 2095-3119 | 10.1016/S2095-3119(13)60412-8     |
| Oxidative stress in diabetic pregnancy: SOD, CAT and GSH-Px activity and lipid peroxidation products.                        | Djordjevic, A.; Spasic, S.; Jovanovic-Galovic, A.; Djordjevic, R.; Grubor-Lajsic, G.                                                                                                                                                                  | The journal of maternal-fetal & neonatal medicine: the official journal of the European Association of Perinatal Medicine, the Federation of Asia and Oceania Perinatal Societies, the International Society of Perinatal Obstetricians | 2004 | 1476-7058 |                                   |
| Oxidative Stress in Granulosa-Lutein Cells From In Vitro Fertilization Patients                                              | Avila, Julio; Gonzalez-Fernandez, Rebeca; Rotoli, Deborah; Hernandez, Jairo; Palumbo, Angela                                                                                                                                                          | Reproductive Sciences                                                                                                                                                                                                                   | 2016 | 1933-7191 | 10.1177/1933719116674077          |
| Oxidative Stress, Antioxidants, and Animal Function                                                                          | Miller, J. K.; Brzezinskaslebodzinska, E.; Madsen, F. C.                                                                                                                                                                                              | Journal of dairy science                                                                                                                                                                                                                | 1993 | 0022-0302 | 10.3168/jds.S0022-0302(93)77620-1 |
| Paternal obesity negatively affects male fertility and assisted reproduction outcomes: a systematic review and meta-analysis | Campbell, Jared M.; Lane, Michelle; Owens, Julie A.; Bakos, Hassan W.                                                                                                                                                                                 | Reproductive Biomedicine Online                                                                                                                                                                                                         | 2015 | 1472-6483 | 10.1016/j.rbmo.2015.07.012        |
| Pharmacological interventions in aging and age-associated disorders                                                          | Kitani, Kenichi                                                                                                                                                                                                                                       | Geriatrics & Gerontology International                                                                                                                                                                                                  | 2007 | 1444-1586 | 10.1111/j.1447-0594.2007.00377.x  |
| Pharmacology of delayed aging and extended lifespan of Caenorhabditis elegans                                                | Collins, James J.; Evason, Kimberley; Kornfeld, Kerry                                                                                                                                                                                                 | Experimental gerontology                                                                                                                                                                                                                | 2006 | 0531-5565 | 10.1016/j.exger.2006.06.038       |
| Physiological Intra-Cytoplasmic Sperm Injection (PICSI) outcomes after oral pretreatment and semen incubation                | Korosi, T.; Barta, C.; Rokob, K.; Torok, T.                                                                                                                                                                                                           | European review for medical and pharmacological sciences                                                                                                                                                                                | 2017 | 1128-3602 |                                   |

|                                                                                                                                                  |                                                                                                                           |                                                            |      |           |                                  |
|--------------------------------------------------------------------------------------------------------------------------------------------------|---------------------------------------------------------------------------------------------------------------------------|------------------------------------------------------------|------|-----------|----------------------------------|
| with myo-inositol in oligoasthenoteratozoospermic men: results from a prospective, randomized controlled trial                                   |                                                                                                                           |                                                            |      |           |                                  |
| Placental antioxidant enzyme status and lipid peroxidation in pregnant women with type 1 diabetes: The effect of vitamin C and E supplementation | Johnston, Philip C.; McCance, David R.; Holmes, Valerie A.; Young, Ian S.; McGinty, Ann                                   | Journal of diabetes and its complications                  | 2016 | 1056-8727 | 10.1016/j.jdiacomp.2015.10.001   |
| Potential biological role of poly (ADP-ribose) polymerase (PARP) in male gametes                                                                 | Agarwal, Ashok; Mahfouz, Reda Z.; Sharma, Rakesh K.; Sarkar, Oli; Mangrola, Devna; Mathur, Premendu P.                    | Reproductive Biology and Endocrinology                     | 2009 | 1477-7827 | 10.1186/1477-7827-7-143          |
| Probiotic yogurt improves antioxidant status in type 2 diabetic patients                                                                         | Ejtahed, Hanie S.; Mohtadi-Nia, Javad; Homayouni-Rad, Aziz; Niafar, Mitra; Asghari-Jafarabadi, Mohammad; Mofid, Vahid     | Nutrition                                                  | 2012 | 0899-9007 | 10.1016/j.nut.2011.08.013        |
| Pro-oxidative and anti-oxidative imbalance in human semen and its relation with male fertility                                                   | Garrido, N.; Meseguer, M.; Simon, C.; Pellicer, A.; Remohi, J.                                                            | Asian Journal of Andrology                                 | 2004 | 1008-682X |                                  |
| Radiations and male fertility                                                                                                                    | Kesari, Kavindra Kumar; Agarwal, Ashok; Henkel, Ralf                                                                      | Reproductive Biology and Endocrinology                     | 2018 | 1477-7827 | 10.1186/s12958-018-0431-1        |
| Reactive oxygen species and their influence on stallion semen fertility - a review                                                               | Pagl, R.; Aurich, J.; Aurich, C.                                                                                          | Pferdeheilkunde                                            | 2006 | 0177-7726 | 10.21836/PEM20060217             |
| Reactive oxygen species in human sperm suspensions: production by leukocytes and the generation of NADPH to protect sperm against their effects  | Ford, W. C. L.; Whittington, K.; Williams, A. C.                                                                          | International journal of andrology                         | 1997 | 0105-6263 |                                  |
| Recent scenario of obesity and male fertility                                                                                                    | Shukla, K. K.; Chambial, S.; Dwivedi, S.; Misra, S.; Sharma, P.                                                           | Andrology                                                  | 2014 | 2047-2919 | 10.1111/andr.270                 |
| Red blood cell glutathione peroxidase activity in female nulligravid and pregnant rats                                                           | Gallo, Giuseppe; Martino, Guglielmo                                                                                       | Reproductive Biology and Endocrinology                     | 2009 | 1477-7827 | 10.1186/1477-7827-7-7            |
| Redox regulation of fertilisation and the spermatogenic process                                                                                  | Fujii, Junichi; Tsunoda, Satoshi                                                                                          | Asian Journal of Andrology                                 | 2011 | 1008-682X | 10.1038/aja.2011.10              |
| Reduction of the incidence of sperm DNA fragmentation by oral antioxidant treatment                                                              | Greco, E.; Iacobelli, M.; Rienzi, L.; Ubaldi, F.; Ferrero, S.; Tesarik, J.                                                | Journal of andrology                                       | 2005 | 0196-3635 | 10.2164/jandrol.04146            |
| Resistance exercise modulates male factor infertility through anti-inflammatory and antioxidative mechanisms in infertile men: A RCT             | Maleki, Behzad Hajizadeh; Tartibian, Bakhtyar                                                                             | Life Sciences                                              | 2018 | 0024-3205 | 10.1016/j.lfs.2018.04.039        |
| Resveratrol protects quail hepatocytes against heat stress: modulation of the Nrf2 transcription factor and heat shock proteins                  | Sahin, K.; Orhan, C.; Akdemir, F.; Tuzcu, M.; Iben, C.; Sahin, N.                                                         | Journal of Animal Physiology and Animal Nutrition          | 2012 | 0931-2439 | 10.1111/j.1439-0396.2010.01123.x |
| Review of local herbal compounds found in the Iranian traditional medicine known to optimise male fertility                                      | Nejatbakhsh, F.; Shirbeigi, L.; Rahimi, R.; Abolhassani, H.                                                               | Andrologia                                                 | 2016 | 0303-4569 | 10.1111/and.12675                |
| Review: Diagnosis and impact of sperm DNA alterations in assisted reproduction                                                                   | Simon, Luke; Emery, Benjamin R.; Carrell, Douglas T.                                                                      | Best Practice & Research Clinical Obstetrics & Gynaecology | 2017 | 1521-6934 | 10.1016/j.bpobgyn.2017.07.003    |
| Review: Maternal and placental antioxidant response to preeclampsia - Impact on vasoactive eicosanoids                                           | Bilodeau, J. -F                                                                                                           | Placenta                                                   | 2014 | 0143-4004 | 10.1016/j.placenta.2013.11.013   |
| Role of antioxidants in gestational diabetes mellitus and relation to fetal outcome: a randomized controlled trial                               | Maged, Ahmed M.; Torky, Haitham; Fouad, Mona A.; GadAllah, Sherine H.; Waked, Neven M.; Gayed, Ahmed S.; Salem, Ashraf K. | Journal of Maternal-Fetal & Neonatal Medicine              | 2016 | 1476-7058 | 10.3109/14767058.2016.1154526    |
| Role of copper in the process of spermatogenesis.                                                                                                | Ogorek, Mateusz; Gasior, Lukasz; Pierzchala, Olga; Daszkiewicz, Regina; Lenartowicz, Malgorzata                           | Postepy higieny i medycyny doswiadczonej (Online)          | 2017 |           |                                  |
| Role of oxidants in male infertility: rationale, significance, and treatment                                                                     | Agarwal, A.; Saleh, R. A.                                                                                                 | Urologic Clinics of North America                          | 2002 | 0094-0143 | 10.1016/S0094-0143(02)00081-2    |



|                                                                                                                                                                             |                                                                                                                                                                                                                                                  |                                               |      |                                                 |                                      |
|-----------------------------------------------------------------------------------------------------------------------------------------------------------------------------|--------------------------------------------------------------------------------------------------------------------------------------------------------------------------------------------------------------------------------------------------|-----------------------------------------------|------|-------------------------------------------------|--------------------------------------|
| Role of oxidative stress and antioxidants in male infertility                                                                                                               | Sikka, S. C.; Rajasekaran, M.; Hellstrom, W. J. G.                                                                                                                                                                                               | Journal of andrology                          | 1995 | 0196-3635                                       |                                      |
| Role of Oxidative Stress in Male Reproductive Dysfunctions with Reference to Phthalate Compounds                                                                            | Sedha, Sapna; Kumar, Sunil; Shukla, Shruti                                                                                                                                                                                                       | Urology Journal                               | 2015 | 1735-1308                                       |                                      |
| Role of reactive oxygen species in male infertility                                                                                                                         | Sharma, R. K.; Agarwal, A.                                                                                                                                                                                                                       | Urology                                       | 1996 | 0090-4295                                       | 10.1016/S0090-4295(96)00313-5        |
| Role of the antioxidants in the protection against oxidative stress in cattle: Nonenzymatic mechanisms (Part 2).                                                            | Kleczkowski, M.; Klucinski, W.; Sikora, J.; Zdanowicz, M.; Dziekan, P.                                                                                                                                                                           | Polish Journal of Veterinary Sciences         | 2003 | 1505-1773                                       |                                      |
| Role of Withania somnifera (Ashwagandha) in the management of male infertility                                                                                              | Sengupta, Pallav; Agarwal, Ashok; Pogrebetskaya, Maria; Roychoudhury, Shubhadeep; Durairajanayagam, Damayanthi; Henkel, Ralf                                                                                                                     | Reproductive Biomedicine Online               | 2018 | 1472-6483                                       | 10.1016/j.rbmo.2017.11.007           |
| Sarcopenia is more than a muscular deficit                                                                                                                                  | Fulle, S.; Belia, S.; Di Tano, G.                                                                                                                                                                                                                | Archives Italiennes de Biologie               | 2005 | 0003-9829                                       |                                      |
| Seminal suPAR Levels as Marker of Abacterial Male Accessory Gland Inflammation in Hypogonadism                                                                              | Milardi, Domenico; Grande, Giuseppe; Autilio, Chiara; Mancini, Francesca; De Marinis, Laura; Marana, Riccardo; Zuppi, Cecilia; Urbani, Andrea; Pontecorvi, Alfredo; Baroni, Silvia                                                               | Protein and Peptide Letters                   | 2018 | 0929-8665                                       | 10.2174/0929866525666180418121421    |
| Sperm chromatin structure and male fertility: biological and clinical aspects                                                                                               | Erenpreiss, J.; Spano, M.; Erenpreisa, J.; Bungum, M.; Giwercman, A.                                                                                                                                                                             | Asian Journal of Andrology                    | 2006 | 1008-682X                                       | 10.1111/j.1745-7262.2006.00112.x     |
| Sperm Cryopreservation: Effects on Chromatin Structure                                                                                                                      | Paoli, Donatella; Lombardo, Francesco; Lenzi, Andrea; Gandini, Loredana                                                                                                                                                                          | Genetic Damage in Human Spermatozoa           | 2014 | 0065-2598; 978-1-4614-7783-9; 978-1-4614-7782-2 | 10.1007/978-1-4614-7783-9_9          |
| Sperm DNA integrity assays: diagnostic and prognostic challenges and implications in management of infertility                                                              | Shamsi, Monis Bilal; Imam, Syed Nazar; Dada, Rima                                                                                                                                                                                                | Journal of assisted reproduction and genetics | 2011 | 1058-0468                                       | 10.1007/s10815-011-9631-8            |
| Sperm function tests and fertility                                                                                                                                          | Aitken, R. J.                                                                                                                                                                                                                                    | International journal of andrology            | 2006 | 0105-6263                                       | 10.1111/j.1365-2605.2005.00630.x     |
| Sperm glucose transport and metabolism in diabetic individuals                                                                                                              | Dias, Tania R.; Alves, Marco G.; Silva, Branca M.; Oliveira, Pedro F.                                                                                                                                                                            | Molecular and cellular endocrinology          | 2014 | 0303-7207                                       | 10.1016/j.mce.2014.08.005            |
| Sperm Proteome: What Is on the Horizon?                                                                                                                                     | Mohanty, Gayatri; Swain, Nirlipta; Samanta, Luna                                                                                                                                                                                                 | Reproductive Sciences                         | 2015 | 1933-7191                                       | 10.1177/1933719114558918             |
| Spermatozoal sensitive biomarkers to defective protaminosis and fragmented DNA                                                                                              | Angelopoulou, Roxani; Plastira, Konstantina; Msaouel, Pavlos                                                                                                                                                                                     | Reproductive Biology and Endocrinology        | 2007 | 1477-7827                                       | 10.1186/1477-7827-5-36               |
| Supplementation of ram semen extender to improve seminal quality and fertility rate                                                                                         | Allai, Larbi; Benmoula, Anass; Maia, Marciane da Silva; Nasser, Boubker; El Amiri, Bouchra                                                                                                                                                       | Animal Reproduction Science                   | 2018 | 0378-4320                                       | 10.1016/j.anireprosci.2018.03.019    |
| Supplementation of vitamin E, selenium and increased energy allowance mitigates the transition stress and improves postpartum reproductive performance in the crossbred cow | Khatti, Amit; Mehrotra, Sanjeev; Patel, Pankaj Kumar; Singh, Gyanendra; Maurya, Vijai Prakash; Mahla, Ajit Singh; Chaudhari, Ravjibhai Karshanbhai; Das, Gautam Kumar; Singh, Mithilesh; Sarkar, Mihir; Kumar, Harendra; Krishnaswamy, Narayanan | Theriogenology                                | 2017 | 0093-691X                                       | 10.1016/j.theriogenology.2017.08.014 |
| Supplementation with copper edetate in control of Haemonchus contortus of sheep, and its effect on cholinesterase's and superoxide dismutase activities                     | Grosskopf, Hyolanda M.; Grosskopf, Rhayana K.; Biazus, Angelisa H.; Leal, Marta L. R.; Bottari, Nathieli B.; Alves, Mariana S.; Schetinger, Maria Rosa C.; Morsch, Vera M.; Machado, Gustavo; Baldissera, Matheus D.; Da Silva, Aleksandro S.    | Experimental parasitology                     | 2017 | 0014-4894                                       | 10.1016/j.exppara.2016.12.011        |

|                                                                                                                                                                  |                                                                                                                                   |                                                                |      |           |                               |
|------------------------------------------------------------------------------------------------------------------------------------------------------------------|-----------------------------------------------------------------------------------------------------------------------------------|----------------------------------------------------------------|------|-----------|-------------------------------|
| The Characteristics of Blood Glucose and WBC Counts in Peripheral Blood of Cases of Hand Foot and Mouth Disease in China: A Systematic Review                    | Li, Yuyun; Zhu, Runan; Qian, Yuan; Deng, Jie                                                                                      | Plos One                                                       | 2012 | 1932-6203 | 10.1371/journal.pone.0029003  |
| The controversial efficacy of vitamin E for human male infertility                                                                                               | Bolle, P.; Evandri, M. G.; Saso, L.                                                                                               | Contraception                                                  | 2002 | 0010-7824 | 10.1016/S0010-7824(02)00277-9 |
| The Effect of Chronic Prostatitis/Chronic Pelvic Pain Syndrome (CP/CPPS) on Semen Parameters in Human Males: A Systematic Review and Meta-Analysis               | Fu, Weihua; Zhou, Zhansong; Liu, Shijian; Li, Qianwei; Yao, Jiwei; Li, Weibing; Yan, Junan                                        | Plos One                                                       | 2014 | 1932-6203 | 10.1371/journal.pone.0094991  |
| The effect of cigarette smoking, alcohol consumption and fruit and vegetable consumption on IVF outcomes: a review and presentation of original data             | Firns, Sarah; Cruzat, Vinicius Fernandes; Keane, Kevin Noel; Joesbury, Karen A.; Lee, Andy H.; Newsholme, Philip; Yovich, John L. | Reproductive Biology and Endocrinology                         | 2015 | 1477-7827 | 10.1186/s12958-015-0133-x     |
| The effect of environmental contaminants on testicular function                                                                                                  | Mathur, Premendu Prakash; D'Cruz, Shereen Cynthia                                                                                 | Asian Journal of Andrology                                     | 2011 | 1008-682X | 10.1038/aja.2011.40           |
| The Effects of Honey Supplementation on Seminal Plasma Cytokines, Oxidative Stress Biomarkers, and Antioxidants During 8 Weeks of Intensive Cycling Training     | Tartibian, Bakhtyar; Maleki, Behzad Hajizadeh                                                                                     | Journal of andrology                                           | 2012 | 0196-3635 | 10.2164/jandrol.110.012815    |
| The effects of hormone replacement therapy combined with vitamins C and E on antioxidants levels and lipid profiles in postmenopausal women with type 2 diabetes | Naziroglu, M.; Simsek, M.; Simsek, H.; Aydilek, N.; Ozcan, Z.; Atilgan, R.                                                        | Clinica Chimica Acta                                           | 2004 | 0009-8981 | 10.1016/j.cccn.2004.01.031    |
| The effects of three different exercise modalities on markers of male reproduction in healthy subjects: a randomized controlled trial                            | Maleki, Behzad Hajizadeh; Tartibian, Bakhtyar; Chehrizi, Mohammad                                                                 | Reproduction                                                   | 2017 | 1470-1626 | 10.1530/REP-16-0318           |
| The etiology of oxidative stress in the various species of animals, a review                                                                                     | Puppel, Kamila; Kapusta, Aleksandra; Kuczynska, Beata                                                                             | Journal of the science of food and agriculture                 | 2015 | 0022-5142 | 10.1002/jsfa.7015             |
| The hazardous effects of tobacco smoking on male fertility                                                                                                       | Dai, Jing-Bo; Wang, Zhao-Xia; Qiao, Zhong-Dong                                                                                    | Asian Journal of Andrology                                     | 2015 | 1008-682X | 10.4103/1008-682X.150847      |
| The impact of obesity on male fertility                                                                                                                          | Chambers, Thomas J. G.; Anderson, Richard A.                                                                                      | Hormones-International Journal of Endocrinology and Metabolism | 2015 | 1109-3099 |                               |
| The Impact of Shock Wave Lithotripsy on Male Fertility: A Critical Analysis of Existing Evidence                                                                 | Philippou, Prodromos; Ralph, David J.; Timoney, Anthony G.                                                                        | Urology                                                        | 2012 | 0090-4295 | 10.1016/j.urology.2011.12.003 |
| The impact of sperm protamine deficiency and sperm DNA damage on human male fertility: a systematic review and meta-analysis                                     | Ni, K.; Spiess, A. -N; Schuppe, H. -C; Steger, K.                                                                                 | Andrology                                                      | 2016 | 2047-2919 | 10.1111/andr.12216            |
| The influence of age and gender on antioxidant enzyme activities in humans and laboratory animals                                                                | Giergiel, Marta; Lopucki, Maciej; Stachowicz, Norbert; Kankofer, Marta                                                            | Aging Clinical and Experimental Research                       | 2012 | 1594-0667 | 10.3275/8587                  |
| The non-genomic effects of endocrine-disrupting chemicals on mammalian sperm                                                                                     | Tavares, R. S.; Escada-Rebelo, S.; Correia, M.; Mota, P. C.; Ramalho-Santos, J.                                                   | Reproduction                                                   | 2016 | 1470-1626 | 10.1530/REP-15-0355           |
| The Protective Effects of Different Sources of Maternal Selenium on Oxidative Stressed Chick Embryo Liver                                                        | Xiao, Xue; Yuan, Dong; Wang, Yong-Xia; Zhan, Xiu-An                                                                               | Biological trace element research                              | 2016 | 0163-4984 | 10.1007/s12011-015-0541-y     |
| The role of antioxidant therapy in the treatment of male infertility: an overview                                                                                | Lombardo, Francesco; Sansone, Andrea; Romanelli, Francesco; Paoli, Donatella; Gandini, Loredana; Lenzi, Andrea                    | Asian Journal of Andrology                                     | 2011 | 1008-682X | 10.1038/aja.2010.183          |
| The Role of Nutraceuticals in Male Fertility                                                                                                                     | Ko, Edmund Y.; Sabanegh, Edmund S.                                                                                                | Urologic Clinics of North America                              | 2014 | 0094-0143 | 10.1016/j.ucl.2013.08.003     |
| The Role of Over-the-Counter Supplements for the Treatment of Male Infertility-Fact or Fiction?                                                                  | Ko, Edmund Y.; Sabanegh, Edmund S., Jr.                                                                                           | Journal of andrology                                           | 2012 | 0196-3635 | 10.2164/jandrol.111.013730    |

|                                                                                                                       |                                                                                      |                                                      |      |           |                                   |
|-----------------------------------------------------------------------------------------------------------------------|--------------------------------------------------------------------------------------|------------------------------------------------------|------|-----------|-----------------------------------|
| The role of oxidative stress and antioxidants in male fertility.                                                      | Walczak-Jedrzejowska, Renata; Wolski, Jan Karol; Slowikowska-Hilczner, Jolanta       | Central European journal of urology                  | 2013 | 2080-4806 | 10.5173/ceju.2013.01.art19        |
| The role of sperm oxidative stress in male infertility and the significance of oral antioxidant therapy               | Gharagozloo, Parviz; Aitken, R. John                                                 | Human Reproduction                                   | 2011 | 0268-1161 | 10.1093/humrep/der132             |
| The roles of cellular reactive oxygen species, oxidative stress and antioxidants in pregnancy outcomes                | Al-Gubory, Kais H.; Fowler, Paul A.; Garrel, Catherine                               | International Journal of Biochemistry & Cell Biology | 2010 | 1357-2725 | 10.1016/j.biocel.2010.06.001      |
| The sperm mitochondrion: Organelle of many functions                                                                  | Moraes, Christa R.; Meyers, Stuart                                                   | Animal Reproduction Science                          | 2018 | 0378-4320 | 10.1016/j.anireprosci.2018.03.024 |
| The toxicology of indium tin oxide                                                                                    | Bomhard, Ernst M.                                                                    | Environmental toxicology and pharmacology            | 2016 | 1382-6689 | 10.1016/j.etap.2016.06.011        |
| TNF-alpha -308 polymorphisms and male infertility risk: A meta-analysis and systematic                                | Mostafa, Taymour; Taymour, Mai                                                       | Journal of Advanced Research                         | 2016 | 2090-1232 | 10.1016/j.jare.2015.07.001        |
| Toxicants and human sperm chromatin integrity                                                                         | Delbes, Geraldine; Hales, Barbara F.; Robaire, Bernard                               | Molecular human reproduction                         | 2010 | 1360-9947 | 10.1093/molehr/gap087             |
| Unravelling the Power of Omics for the Infertile Aging Male                                                           | Bastos, Paulo; Freitas, Maria Joao; Gomes, Andre; Vitorino, Rui; Fardilha, Margarida | Current pharmaceutical design                        | 2017 | 1381-6128 | 10.2174/1381612822666161018155247 |
| Using the alkaline comet assay in prognostic tests for male infertility and assisted reproductive technology outcomes | Lewis, Sheena E. M.; Agbaje, Ishola M.                                               | Mutagenesis                                          | 2008 | 0267-8357 | 10.1093/mutage/gem052             |
| Variations in Antioxidant Genes and Male Infertility.                                                                 | Yu, Bolan; Huang, Zhaofeng                                                           | BioMed research international                        | 2015 |           | 10.1155/2015/513196               |
| Varicocele and testicular function                                                                                    | Pastuszak, Alexander W.; Wang, Run                                                   | Asian Journal of Andrology                           | 2015 | 1008-682X | 10.4103/1008-682X.153539          |
| Varicocele management in the era of in vitro fertilization/intracytoplasmic sperm injection                           | Pathak, Piyush; Chandrashekar, Aravind; Hakky, Tariq S.; Pastuszak, Alexander W.     | Asian Journal of Andrology                           | 2016 | 1008-682X | 10.4103/1008-682X.178482          |
| Varicocele repair: does it still have a role in infertility treatment?                                                | French, Dan B.; Desai, Nisarg R.; Agarwal, Ashok                                     | Current opinion in obstetrics & gynecology           | 2008 | 1040-872X | 10.1097/GCO.0b013e3282fcc00c      |
| What every gynecologist should know about male infertility: an update                                                 | Esteves, Sandro C.; Hamada, Alaa; Kondray, Victor; Pitchika, Aruna; Agarwal, Ashok   | Archives of Gynecology and Obstetrics                | 2012 | 0932-0067 | 10.1007/s00404-012-2274-x         |

## Catalase as molecular target for male infertility diagnosis and monitoring: an overview.

Nuria Rubio, Natalia Huerta, María José Gómez, Rosa María Martínez-Espinosa

Antioxidants

**Supplementary Table S2.** Articles included in the final database that study the relationship between catalase activity variation and male fertility.

| Title Primary                                                                                                                                                                                       | Authors, Primary                                                                                                                                   | Journal                                       | Pub Year | ISSN/ISBN | DOI                               |
|-----------------------------------------------------------------------------------------------------------------------------------------------------------------------------------------------------|----------------------------------------------------------------------------------------------------------------------------------------------------|-----------------------------------------------|----------|-----------|-----------------------------------|
| Alcohol abuse-duration dependent decrease in plasma testosterone and antioxidants in males.                                                                                                         | Maneesh, M.; Dutta, Sanjiba; Chakrabarti, Amit; Vasudevan, D. M.                                                                                   | Indian journal of physiology and pharmacology | 2006     | 0019-5499 |                                   |
| Antioxidants and sperm DNA damage: a clinical perspective                                                                                                                                           | Zini, Armand; Gabriel, Maria San; Baazeem, Abdulaziz                                                                                               | Journal of assisted reproduction and genetics | 2009     | 1058-0468 | 10.1007/s10815-009-9343-5         |
| Cell Phones and Male Infertility: A Review of Recent Innovations in Technology and Consequences                                                                                                     | Agarwal, Ashok; Singh, Aspinder; Hamada, Alaa; Kesari, Kavindra                                                                                    | International Braz J Urol                     | 2011     | 1677-5538 | 10.1590/S1677-55382011000400002   |
| Combined aerobic and resistance exercise training for improving reproductive function in infertile men: a randomized controlled trial                                                               | Maleki, Behzad Hajizadeh; Tartibian, Bakhtyar                                                                                                      | Applied Physiology Nutrition and Metabolism   | 2017     | 1715-5312 | 10.1139/apnm-2017-0249            |
| Effect of Coenzyme Q10 supplementation on antioxidant enzymes activity and oxidative stress of seminal plasma: a double-blind randomised clinical trial                                             | Nadjarzadeh, A.; Shidfar, F.; Amirjannati, N.; Vafa, M. R.; Motevalian, S. A.; Gohari, M. R.; Kakhki, S. A. Nazeri; Akhondi, M. M.; Sadeghi, M. R. | Andrologia                                    | 2014     | 0303-4569 | 10.1111/and.12062                 |
| Effect of pentoxifylline on semen parameters, reproductive hormones, and seminal plasma antioxidant capacity in men with idiopathic infertility: a randomized double-blind placebo-controlled study | Safarinejad, Mohammad Reza                                                                                                                         | International urology and nephrology          | 2011     | 0301-1623 | 10.1007/s11255-010-9826-4         |
| Increased oxidative stress and oxidative damage associated with chronic bacterial prostatitis                                                                                                       | Zhou, J. F.; Xiao, W. Q.; Zheng, Y. C.; Dong, J.; Zhang, S. M.                                                                                     | Asian Journal of Andrology                    | 2006     | 1008-682X | 10.1111/j.1745-7262.2006.00144.x  |
| Lifestyle and fertility: the influence of stress and quality of life on male fertility                                                                                                              | Ilacqua, Alessandro; Izzo, Giulia; Emerenziani, Gian Pietro; Baldari, Carlo; Aversa, Antonio                                                       | Reproductive Biology and Endocrinology        | 2018     | 1477-7827 | 10.1186/s12958-018-0436-9         |
| Mechanisms of male infertility: Role of antioxidants                                                                                                                                                | Sheweita, S. A.; Tilmisany, A. M.; Al-Sawaf, H.                                                                                                    | Current Drug Metabolism                       | 2005     | 1389-2002 | 10.2174/138920005774330594        |
| Melatonin and Male Reproductive Health: Relevance of Darkness and Antioxidant Properties                                                                                                            | Rocha, C. S.; Rato, L.; Martins, A. D.; Alves, M. G.; Oliveira, P. F.                                                                              | Current Molecular Medicine                    | 2015     | 1566-5240 | 10.2174/1566524015666150505155530 |
| Pro-oxidative and anti-oxidative imbalance in human semen and its relation with male fertility                                                                                                      | Garrido, N.; Meseguer, M.; Simon, C.; Pellicer, A.; Remohi, J.                                                                                     | Asian Journal of Andrology                    | 2004     | 1008-682X |                                   |
| Resistance exercise modulates male factor infertility through anti-inflammatory and antioxidative mechanisms in infertile men: A RCT                                                                | Maleki, Behzad Hajizadeh; Tartibian, Bakhtyar                                                                                                      | Life Sciences                                 | 2018     | 0024-3205 | 10.1016/j.lfs.2018.04.039         |
| Role of reactive oxygen species in male infertility                                                                                                                                                 | Sharma, R. K.; Agarwal, A.                                                                                                                         | Urology                                       | 1996     | 0090-4295 | 10.1016/S0090-4295(96)00313-5     |
| Role of Withania somnifera (Ashwagandha) in the management of male infertility                                                                                                                      | Sengupta, Pallav; Agarwal, Ashok; Pogrebetskaya, Maria; Roychoudhury, Shubhadeep; Durairajanayagam, Damayanthi; Henkel, Ralf                       | Reproductive Biomedicine Online               | 2018     | 1472-6483 | 10.1016/j.rbmo.2017.11.007        |

|                                                                                                                                                              |                                                                   |                               |      |           |                            |
|--------------------------------------------------------------------------------------------------------------------------------------------------------------|-------------------------------------------------------------------|-------------------------------|------|-----------|----------------------------|
| The Effects of Honey Supplementation on Seminal Plasma Cytokines, Oxidative Stress Biomarkers, and Antioxidants During 8 Weeks of Intensive Cycling Training | Tartibian, Bakhtyar; Maleki, Behzad Hajizadeh                     | Journal of andrology          | 2012 | 0196-3635 | 10.2164/jandrol.110.012815 |
| The effects of three different exercise modalities on markers of male reproduction in healthy subjects: a randomized controlled trial                        | Maleki, Behzad Hajizadeh; Tartibian, Bakhtyar; Chehrazi, Mohammad | Reproduction                  | 2017 | 1470-1626 | 10.1530/REP-16-0318        |
| The hazardous effects of tobacco smoking on male fertility                                                                                                   | Dai, Jing-Bo; Wang, Zhao-Xia; Qiao, Zhong-Dong                    | Asian Journal of Andrology    | 2015 | 1008-682X | 10.4103/1008-682X.150847   |
| Variations in Antioxidant Genes and Male Infertility.                                                                                                        | Yu, Bolan; Huang, Zhaofeng                                        | BioMed research international | 2015 |           | 10.1155/2015/513196        |
